# Supplementary material for: Effect of Empagliflozin on the Clinical Stability of Patients With Heart Failure and a Reduced Ejection Fraction: The EMPEROR-Reduced Trial
Source: PubMed Central journal article supplement — Circulation. 2020 Oct 21;143(4):326–36. doi: 10.1161/CIRCULATIONAHA.120.051783 (PMC7834905; doi:10.1161/circulationaha.120.051783), 2020-10-21
Supplement: cir-143-326-s001.pdf [file cir-143-326-s001.pdf]

# SUPPLEMENTAL MATERIAL

## Effect of Empagliflozin on the Clinical Stability of Patients with Heart Failure and a Reduced Ejection Fraction: the EMPEROR-Reduced Trial

### **Figure I**

Time to first event analysis of all-cause mortality or all-cause hospitalization in the placebo and empagliflozin groups

### **Figure II**

Effect of empagliflozin on total (first and recurrent) adjudicated hospitalizations for heart failure in 12 prespecified subgroups

### **Figure III**

Time to first event analysis of all-cause mortality, heart failure hospitalization or emergent/urgent care visit for worsening heart failure in the placebo and empagliflozin groups during first 40 days following randomization

### **Figure IV**

Total study visits reporting interval intensification of diuretics for worsening heart failure in the placebo and empagliflozin groups

### **Figure V**

Changes in hematocrit during double-blind treatment in the placebo and empagliflozin groups

### **Figure VI**

Changes in uric acid during double-blind treatment in the placebo and empagliflozin groups

### **Figure VII**

Changes in body weight during double-blind treatment in the placebo and empagliflozin groups

### **Figure VIII**

Changes in N-terminal proBNP during double-blind treatment in the placebo and empagliflozin groups

### **Figure IX**

Changes in systolic blood pressure during double-blind treatment in the placebo and empagliflozin groups

### **Table I**

Frequencies of major outcomes and worsening heart failure events

**Figure I**  
**Time to first event of all-cause mortality or all-cause hospitalization**

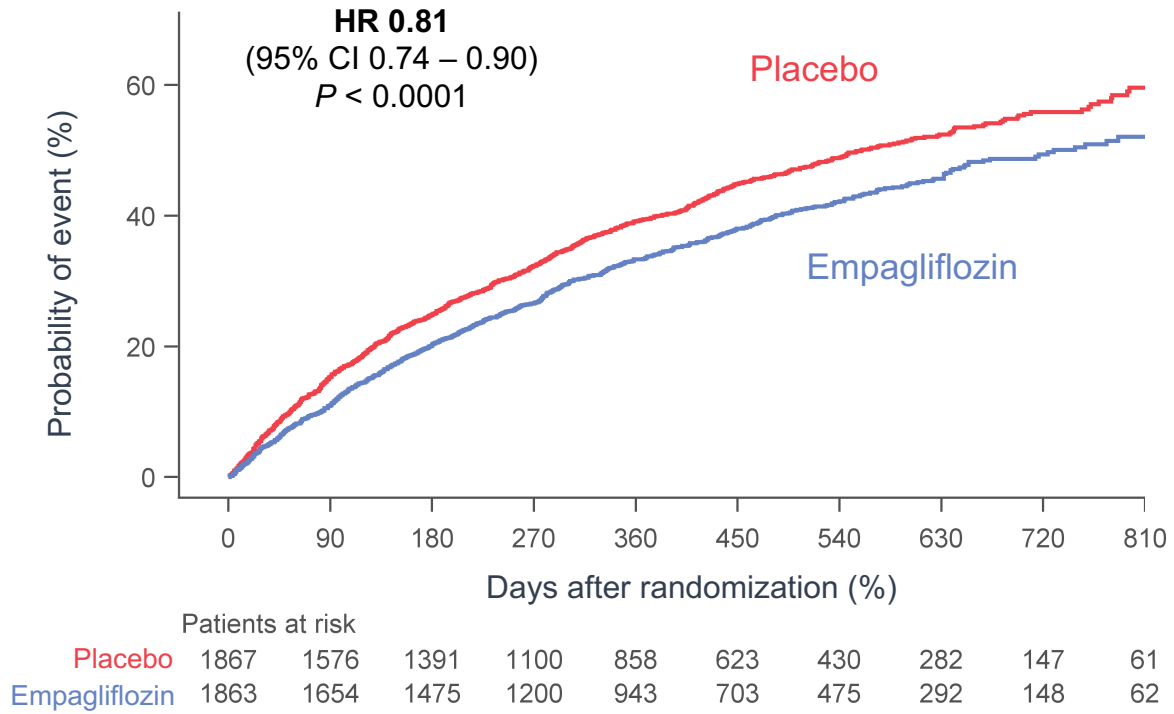

Abbreviations: HR=hazard ratio; CI = confidence interval

**Figure II**  
**Effect of empagliflozin on total (first and recurrent) adjudicated hospitalizations for heart failure in 12 prespecified subgroups**

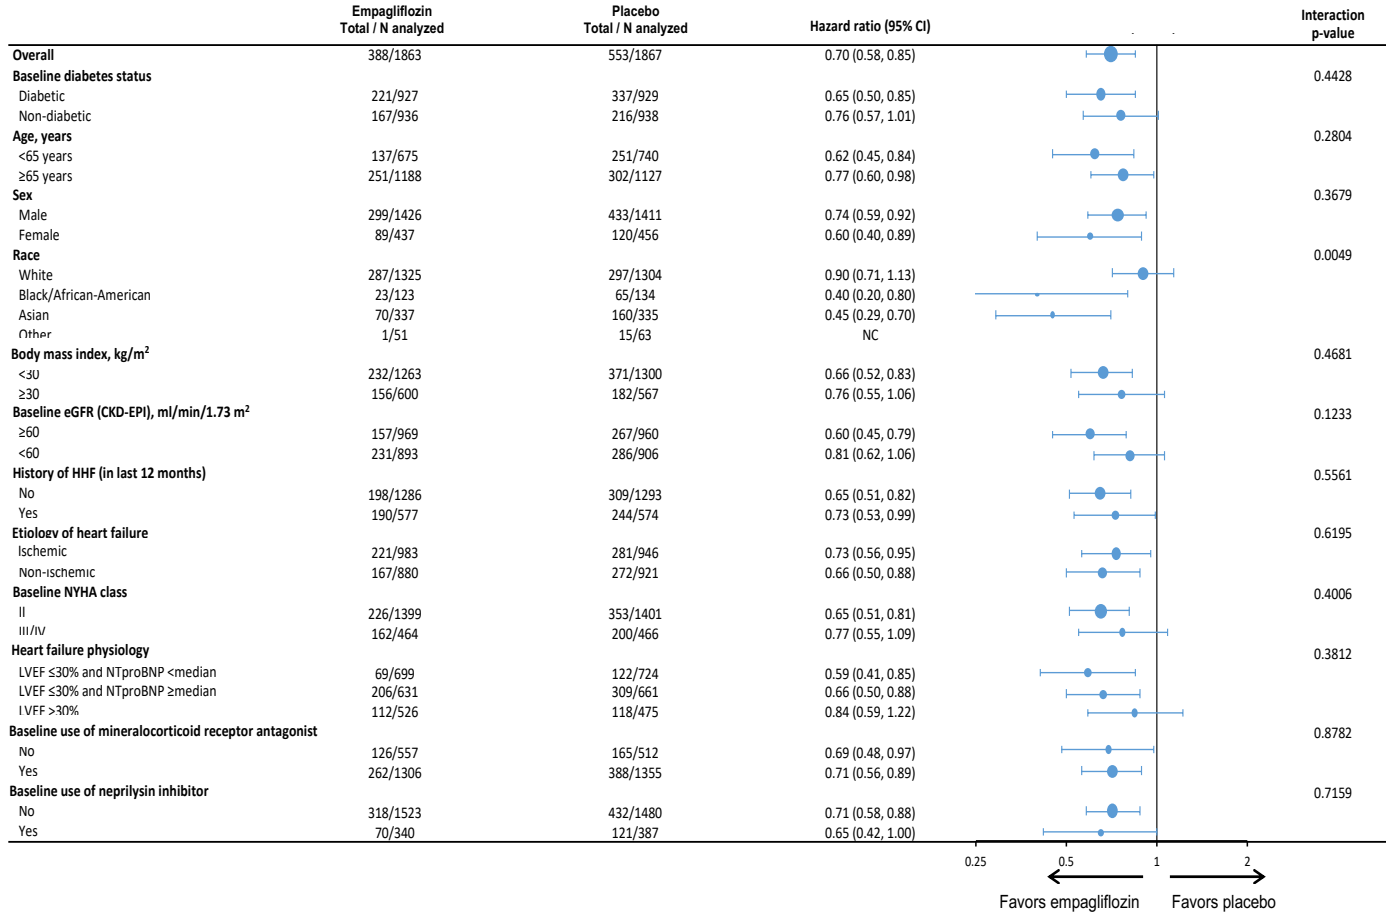

Abbreviations: HHF= heart failure hospitalization; LVEF = left ventricular ejection fraction; NYHA= New York Heart Association

**Figure III**

**Time to first event analysis of all-cause mortality, heart failure hospitalization or emergent/urgent care visit for worsening heart failure in the placebo and empagliflozin groups during first 40 days following randomization**

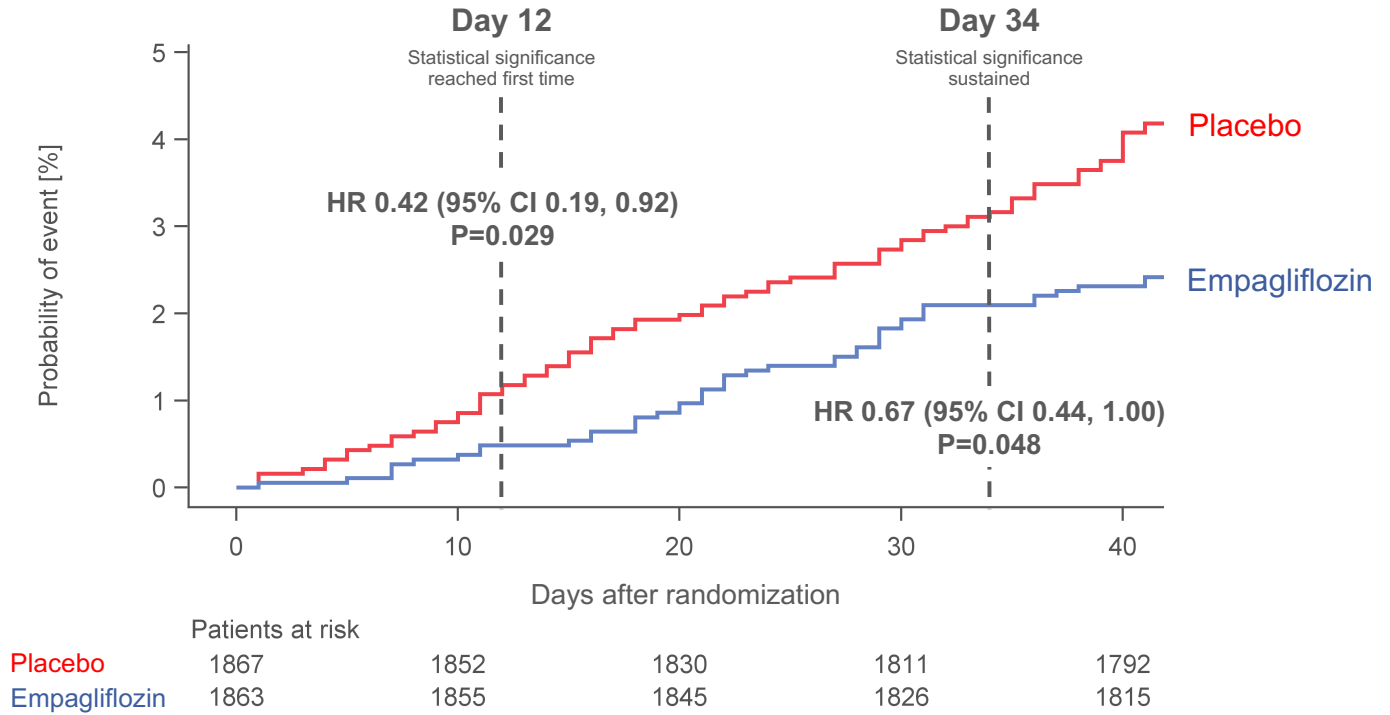

Abbreviations: HR=hazard ratio; CI = confidence interval

**Figure IV**  
**Total study visits reporting interval intensification of diuretics for worsening heart failure**

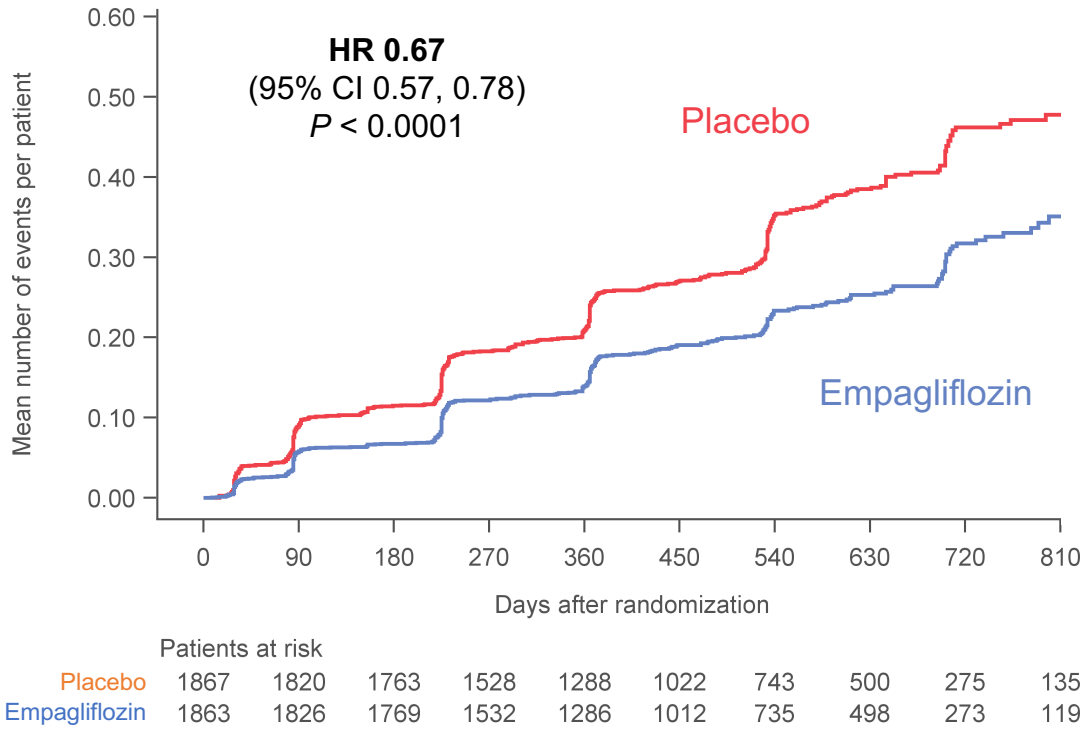

Abbreviations: HR=hazard ratio; CI = confidence interval

**Figure V**  
**Changes in hematocrit in the placebo and empagliflozin groups**

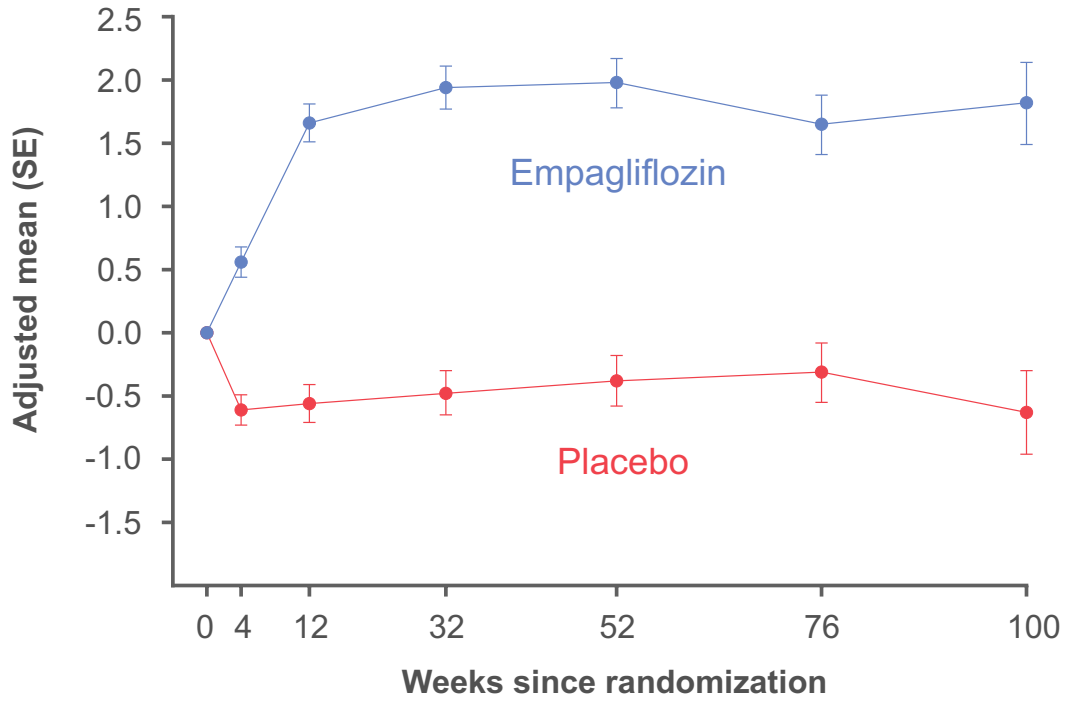

N with data at visit

|               |      |      |      |      |      |     |     |
|---------------|------|------|------|------|------|-----|-----|
| Empagliflozin | 1822 | 1780 | 1742 | 1605 | 1211 | 798 | 381 |
| Placebo       | 1820 | 1775 | 1712 | 1557 | 1195 | 793 | 356 |

**Figure VI**  
**Changes in uric acid in the placebo and empagliflozin group**

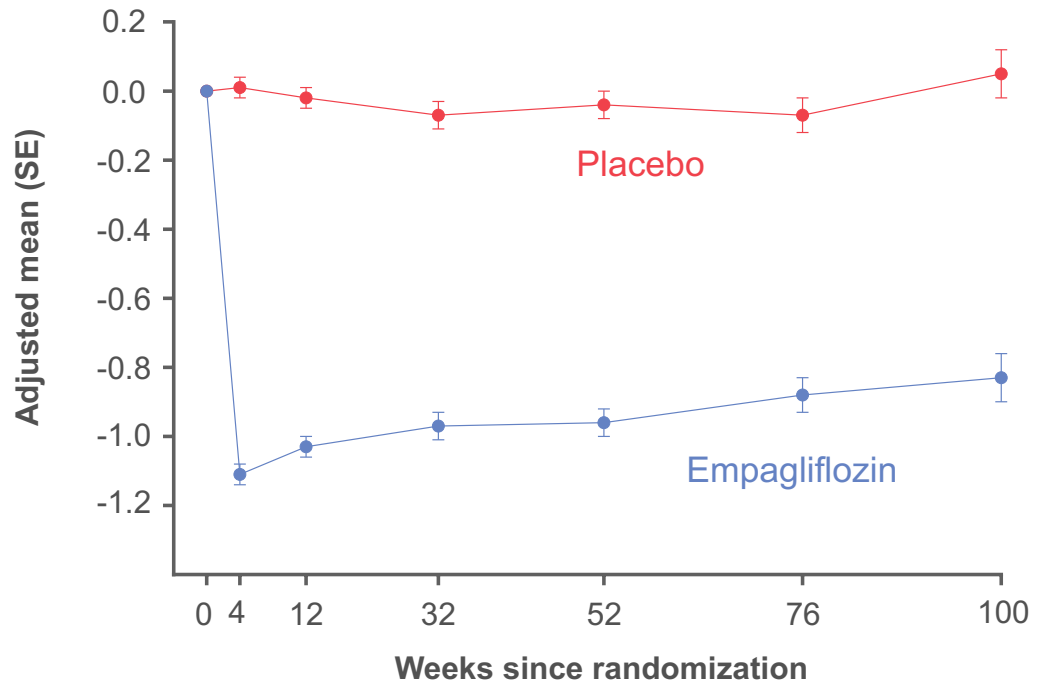

N with data at visit

|               |      |      |      |      |      |     |     |
|---------------|------|------|------|------|------|-----|-----|
| Empagliflozin | 1797 | 1775 | 1732 | 1596 | 1213 | 797 | 383 |
| Placebo       | 1801 | 1771 | 1713 | 1549 | 1201 | 792 | 356 |

**Figure VII**  
**Changes in body weight in the placebo and empagliflozin groups**

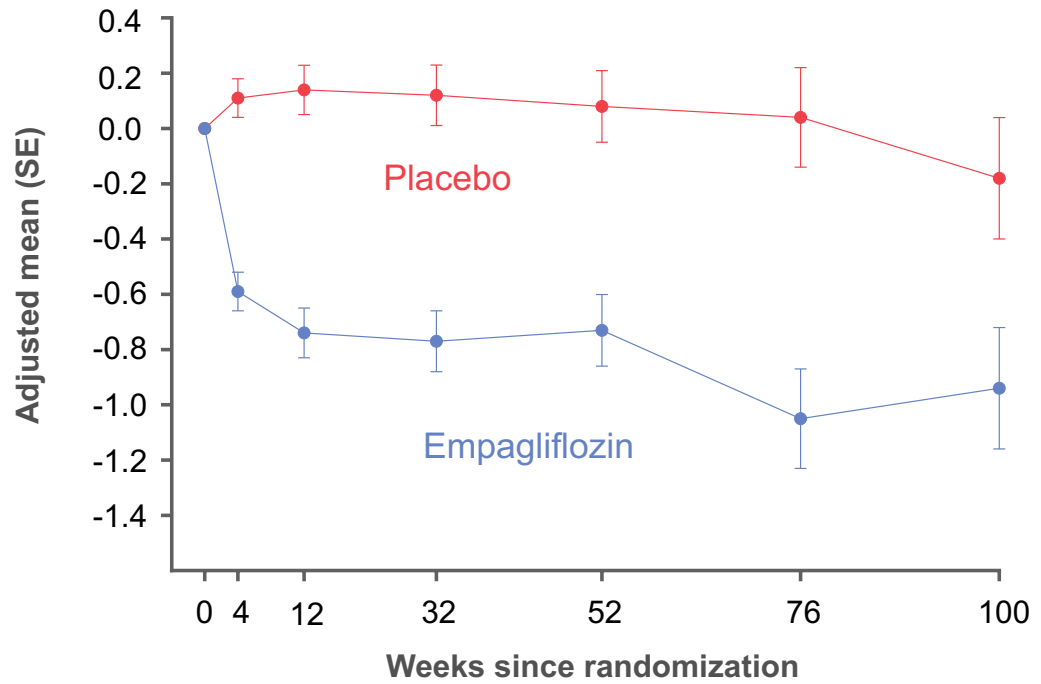

N with data at visit

|               |      |      |      |      |      |     |     |
|---------------|------|------|------|------|------|-----|-----|
| Empagliflozin | 1828 | 1808 | 1768 | 1629 | 1240 | 818 | 395 |
| Placebo       | 1823 | 1803 | 1745 | 1586 | 1229 | 813 | 373 |



**Figure VIII**  
**Changes in N-terminal proBNP in the placebo and empagliflozin groups**

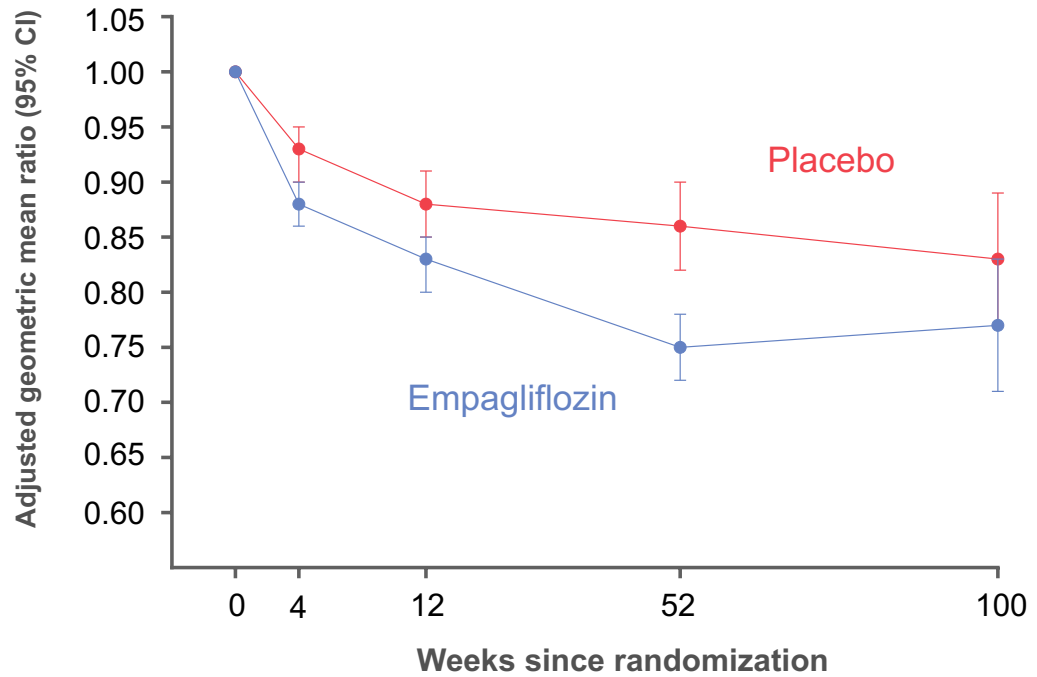

| N with data at visit |  | 0    | 4    | 12   | 52   | 100 |
|----------------------|--|------|------|------|------|-----|
| Empagliflozin        |  | 1824 | 1792 | 1748 | 1323 | 451 |
| Placebo              |  | 1819 | 1779 | 1731 | 1311 | 429 |

Abbreviations: NT-proBNP = N-terminal prohormone B-type natriuretic peptide

**Figure IX**  
**Changes in systolic blood pressure in the placebo and empagliflozin groups**

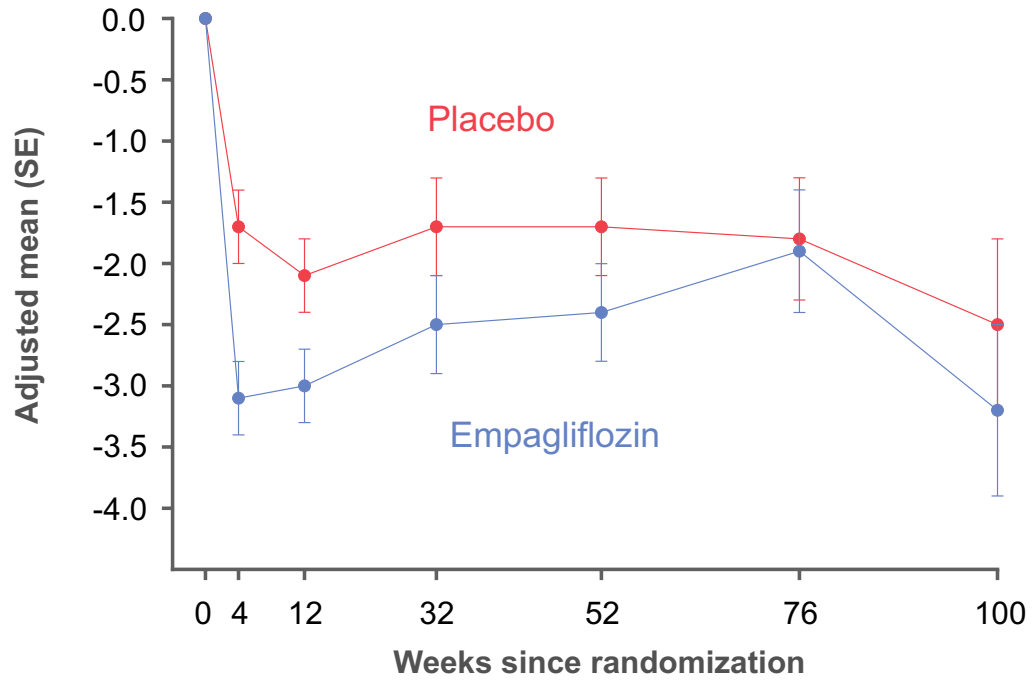

N with data at visit

|               |      |      |      |      |      |     |     |
|---------------|------|------|------|------|------|-----|-----|
| Empagliflozin | 1829 | 1813 | 1769 | 1630 | 1241 | 811 | 395 |
| Placebo       | 1823 | 1803 | 1744 | 1579 | 1226 | 809 | 367 |

**Table I. Frequencies of Major Outcomes and Worsening Heart Failure Events**

|                                                                                                                    | <b>Placebo</b> | <b>Empagliflozin</b> |
|--------------------------------------------------------------------------------------------------------------------|----------------|----------------------|
| <b>Adjudicated hospitalizations for heart failure</b>                                                              |                |                      |
| Patients hospitalized once                                                                                         | 231            | 160                  |
| Patients hospitalized twice                                                                                        | 61             | 50                   |
| Patients hospitalized $\geq 3$ times                                                                               | 50             | 36                   |
| <b>Total (first and recurrent) adjudicated hospitalizations for heart failure</b>                                  |                |                      |
| Number of hospitalizations requiring only oral diuretics                                                           | 27             | 15                   |
| Number of hospitalizations requiring only intravenous diuretics                                                    | 266            | 204                  |
| Number of hospitalizations requiring IV vasodilators                                                               | 54             | 36                   |
| Number of hospitalizations requiring IV vasopressors or positive inotropic drugs                                   | 152            | 92                   |
| Number of hospitalizations with mechanical or surgical intervention                                                | 34             | 24                   |
| <b>Total (first and recurrent) emergent or urgent care visits for heart failure requiring intravenous therapy</b>  |                |                      |
| Patients who required emergent or urgent care once                                                                 | 141            | 87                   |
| Patients who required emergent or urgent care twice                                                                | 22             | 27                   |
| Patients who required emergent or urgent care $\geq 3$ times                                                       | 22             | 12                   |
| <b>Changes in diuretic dose since prior study visit</b>                                                            |                |                      |
| Number of patients who had diuretics were intensified since prior study visit                                      | 414 (22.2%)    | 297 (15.9%)          |
| Total number of study visits that reported that the dose of diuretics had been intensified since prior study visit | 564            | 380                  |
| Number of patients who had reduction in the dose of diuretics since prior study visit                              | 246 (13.2)     | 281 (15.1%)          |
| Total number of study visits that reported that the dose of diuretics had been reduced since prior study visit     | 293            | 334                  |
| <b>Adjudicated cardiovascular events other than heart failure</b>                                                  |                |                      |
| Adjudicated myocardial infarction                                                                                  | 20 (1.1%)      | 19 (1.0%)            |
| Adjudicated stroke                                                                                                 | 35 (1.9%)      | 40 (2.1%)            |
| Adjudicated transient ischemic attack                                                                              | 7 (0.4%)       | 7 (0.4%)             |

Categories are ordered according to severity of intervention, with each category including less intensive but excluding more intensive interventions, i.e., use of intravenous vasopressors or positive inotropic drugs includes the use of diuretics or intravenous vasodilators, but exclude mechanical or surgical intervention). A total of 20 patients in the placebo group and 16 in empagliflozin group did not have complete information on the utilization of drug or non-drug interventions during hospitalization.
